# Supplementary material for: Efficacy and Safety Profile of Tricyclo-DNA Antisense Oligonucleotides in Duchenne Muscular Dystrophy Mouse Model
Source: PubMed Central journal article supplement — Mol Ther Nucleic Acids. 2017 Jun 22;8:144–57. doi: 10.1016/j.omtn.2017.06.013 (PMC5498286; doi:10.1016/j.omtn.2017.06.013), 2017-06-22
Supplement: mmc1.pdf [file mmc1.pdf]

**OMTN, Volume 8**

## **Supplemental Information**

### **Efficacy and Safety Profile of Tricyclo-DNA**

### **Antisense Oligonucleotides in Duchenne**

### **Muscular Dystrophy Mouse Model**

**Karima Relizani, Graziella Griffith, Lucía Echevarría, Faouzi Zarrouki, Patricia Facchinetti, Cyrille Vaillend, Christian Leumann, Luis Garcia, and Aurélie Goyenville**

## Supplementary materials

**Fig. S1. Evaluation of 13mer-tcDNA following intramuscular injection.**

**Fig. S2. *In vitro* complement activation analysis.**

**Fig. S3. Creatinine normalized renal injury biomarkers.**

**Fig. S4. Hybridization mediated-Off Target effects (OTEs) on mRNA mouse transcript.**

**Table S1. RT-qPCR primer sequences**

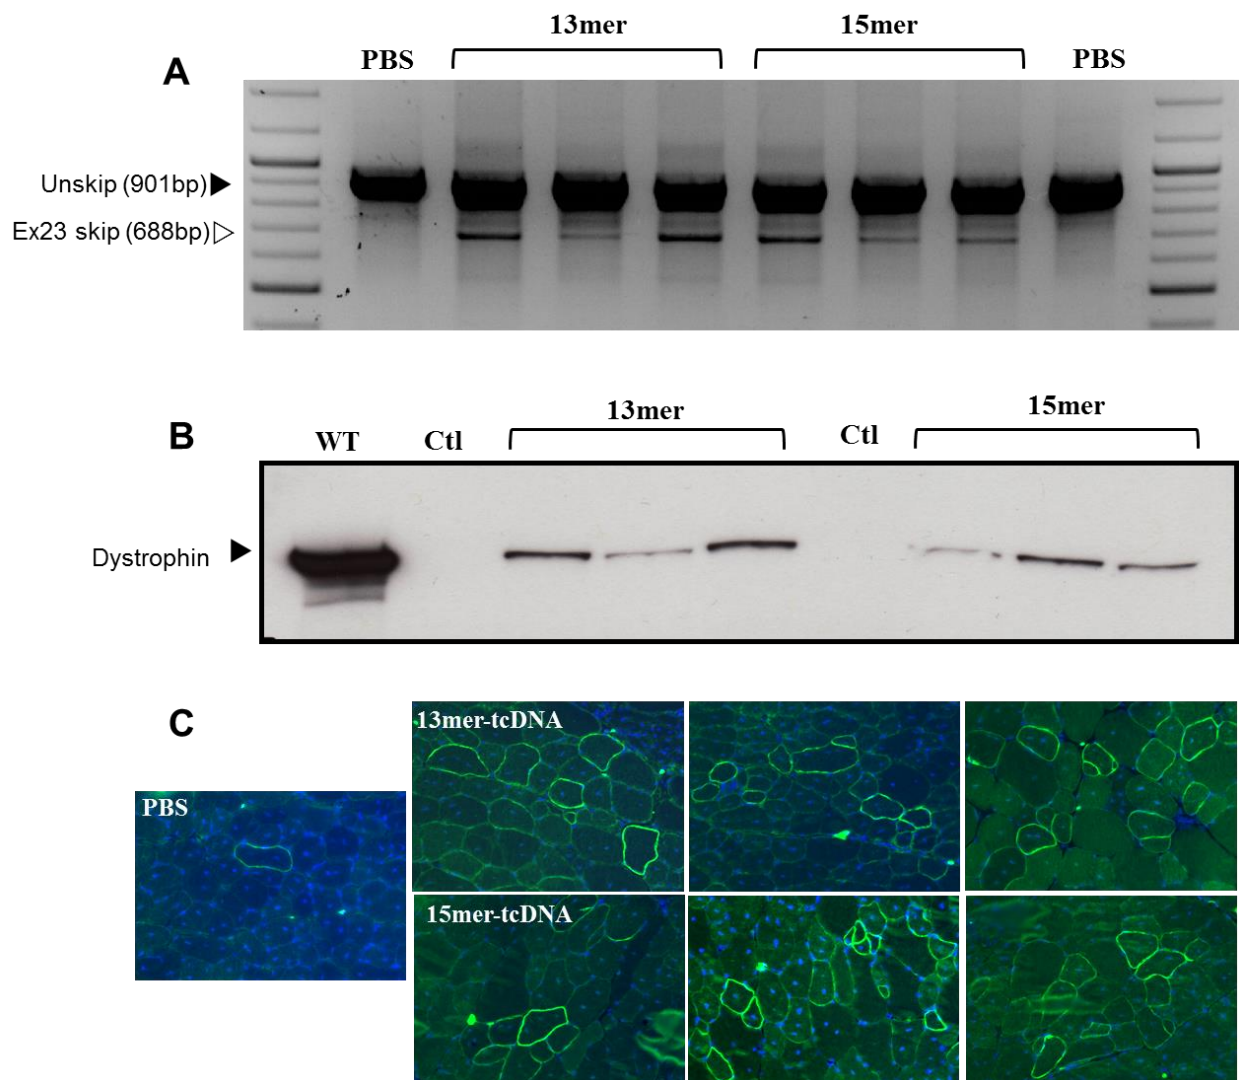

**Fig. S1. Evaluation of 13mer-tcDNA following intramuscular injection.** Adult *mdx* mice were injected intramuscularly (IM) in the tibialis anterior (TA) muscle with 30  $\mu$ g of tcDNA-13mer or tcDNA-15mer (previously described) and muscles were collected 3 weeks after the injection for analysis (n=3 per group). **(A)** Detection of exon 23–skipped dystrophin mRNA in *mdx* muscles after IM delivery of tcDNA 13mer or tcDNA-15mer for comparison. The lower 688-bp fragment corresponding to the exon 23–skipped mRNA is detected by nested RT-PCR. **(B)** Western blot showing dystrophin expression in TA muscles injected with 30ug of tcDNA-13mer or tcDNA-15mer compared to *mdx* control (Ctl) and *WT* control mice. 100  $\mu$ g of total protein were loaded for all samples. **(C)** Dystrophin immunostaining on transverse sections from *mdx* treated muscles. Nuclei, blue (DAPI); Dystrophin, green.

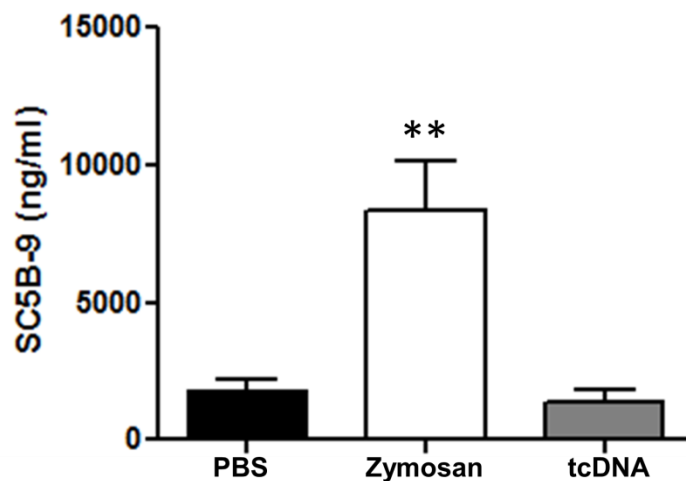

**Fig. S2. *In vitro* complement activation analysis.** SC5b-9 levels were measured in normal human serum samples at 45 minutes after PBS or tcDNA incubation. Zymosan was used as a positive control. (Data are expressed as means  $\pm$  SEM). P <0.05 are significant (Mann-Whitney U tests).

### 6 week-old

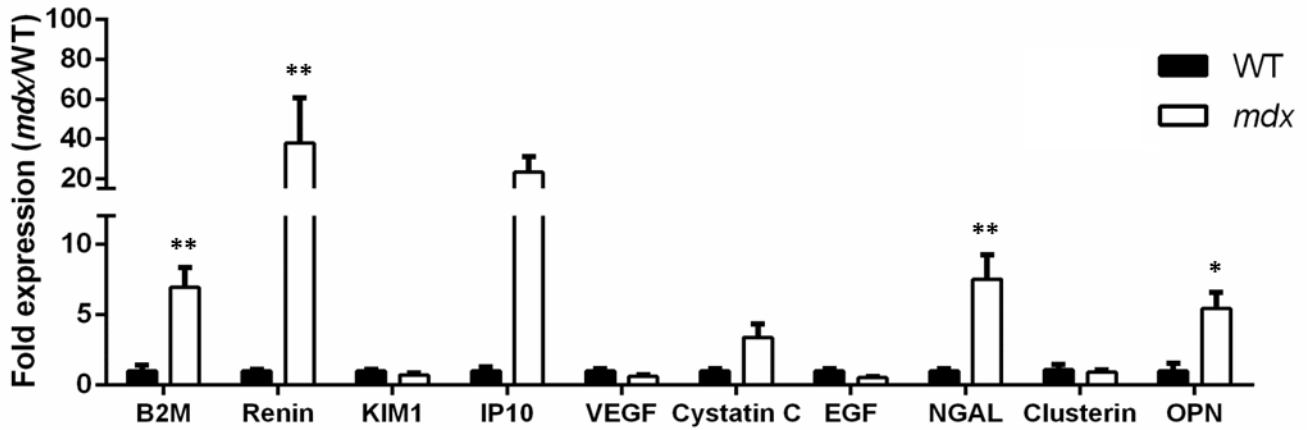

|         | B2M<br>( $\mu\text{g}/\text{mg}$ ) | Renin<br>( $\mu\text{g}/\text{mg}$ ) | Kim1<br>( $\mu\text{g}/\text{mg}$ ) | IP10<br>( $\mu\text{g}/\text{mg}$ ) | VEGF<br>( $\mu\text{g}/\text{mg}$ ) | Cystatin C<br>( $\text{ng}/\text{mg}$ ) | EGF<br>( $\mu\text{g}/\text{mg}$ ) | NGAL ( $\text{ng}/\text{mg}$ ) | Clusterin<br>( $\mu\text{g}/\text{mg}$ ) | OPN ( $\text{ng}/\text{mg}$ ) |
|---------|------------------------------------|--------------------------------------|-------------------------------------|-------------------------------------|-------------------------------------|-----------------------------------------|------------------------------------|--------------------------------|------------------------------------------|-------------------------------|
| WT      | 7.81 $\pm$ 3.41                    | 0.06 $\pm$ 0.01                      | 0.32 $\pm$ 0.04                     | 0.09 $\pm$ 0.03                     | 0.14 $\pm$ 0.02                     | 263.70 $\pm$ 49.39                      | 5.46 $\pm$ 0.95                    | 102.30 $\pm$ 17.51             | 5.19 $\pm$ 0.60                          | 263.36 $\pm$ 142.67           |
| mdx     | 50.79 $\pm$ 16.71                  | 2.45 $\pm$ 1.46                      | 0.25 $\pm$ 0.05                     | 2.27 $\pm$ 0.79                     | 0.09 $\pm$ 0.02                     | 827.63 $\pm$ 389.08                     | 3.21 $\pm$ 0.32                    | 729.04 $\pm$ 279.23            | 4.62 $\pm$ 0.59                          | 1360.39 $\pm$ 412.65          |
| P value | <0.05                              | <0.05                                | 0.85                                | 0.057                               | 0.11                                | 0.55                                    | 0.19                               | <0.05                          | 0.68                                     | 0.06                          |

Creatinine normalised renal injury biomarkers in 6 week-old WT and mdx mice. (mean  $\pm$  SEM). P-values <0.05 are significant (Mann-Whitney tests).

### 20 week-old

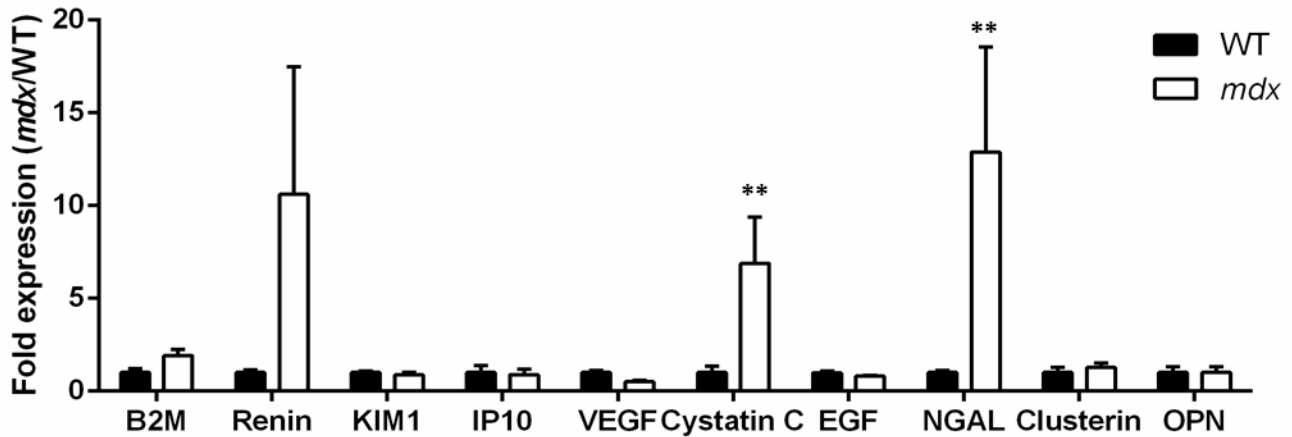

|         | B2M<br>( $\mu\text{g}/\text{mg}$ ) | Renin<br>( $\mu\text{g}/\text{mg}$ ) | Kim1<br>( $\mu\text{g}/\text{mg}$ ) | IP10<br>( $\mu\text{g}/\text{mg}$ ) | VEGF<br>( $\mu\text{g}/\text{mg}$ ) | Cystatin C<br>( $\text{ng}/\text{mg}$ ) | EGF<br>( $\mu\text{g}/\text{mg}$ ) | NGAL ( $\text{ng}/\text{mg}$ ) | Clusterin<br>( $\mu\text{g}/\text{mg}$ ) | OPN ( $\text{ng}/\text{mg}$ ) |
|---------|------------------------------------|--------------------------------------|-------------------------------------|-------------------------------------|-------------------------------------|-----------------------------------------|------------------------------------|--------------------------------|------------------------------------------|-------------------------------|
| WT      | 27.55 $\pm$ 5.55                   | 0.09 $\pm$ 0.02                      | 0.34 $\pm$ 0.03                     | 0.80 $\pm$ 0.30                     | 0.24 $\pm$ 0.03                     | 104.26 $\pm$ 37.02                      | 4.89 $\pm$ 0.44                    | 110.74 $\pm$ 13.54             | 6.32 $\pm$ 1.80                          | 327.24 $\pm$ 100.7            |
| mdx     | 53.19 $\pm$ 9.28                   | 1.00 $\pm$ 0.65                      | 0.30 $\pm$ 0.05                     | 0.72 $\pm$ 0.23                     | 0.12 $\pm$ 0.02                     | 718.37 $\pm$ 259.01                     | 3.95 $\pm$ 0.16                    | 1427.38 $\pm$ 626.4<br>3       | 8.02 $\pm$ 1.54                          | 1818.24 $\pm$ 698.7<br>4      |
| P value | 0.05                               | 0.09                                 | 0.66                                | 0.94                                | <0.05                               | <0.05                                   | 0.15                               | <0.05                          | 0.66                                     | 0.22                          |

Creatinine normalised renal injury biomarkers in 20 week-old WT and mdx mice. (mean  $\pm$  SEM). P-values <0.05 are significant (Mann-Whitney tests).

**Fig. S3. Creatinine normalized renal injury biomarkers** in 6 and 20 week-old *WT* and *mdx* mice. (Data are expressed as means  $\pm$  SEM). P <0.05 are significant (Mann-Whitney U tests).

**A** Nucleotide Blast (blastn) on mouse transcript on NCBI: <https://blast.ncbi.nlm.nih.gov/Blast.cgi>  
 Sequence query (tcDNA-13mer) : 5'- CCTCGGCTTACCT -3'

| Genes           | Score | Identities   | Strand     | Match on mRNA   | Tissue expression | Kidney expression |
|-----------------|-------|--------------|------------|-----------------|-------------------|-------------------|
| <b>Kremen 1</b> | 24.3  | 12/12 (100%) | Plus/Minus | Yes (last Exon) | Ubiquitous        | High              |
| <b>Kif13a</b>   | 24.3  | 12/12 (100%) | Plus/Plus  | No              | Ubiquitous        | High              |
| <b>Hopx</b>     | 24.3  | 12/12 (100%) | Plus/Plus  | No              | Limited           | Very low          |
| <b>Ucn3</b>     | 24.3  | 12/12 (100%) | Plus/Plus  | No              | Limited           | Very low          |

**B** Sequence alignment on Kremen 1

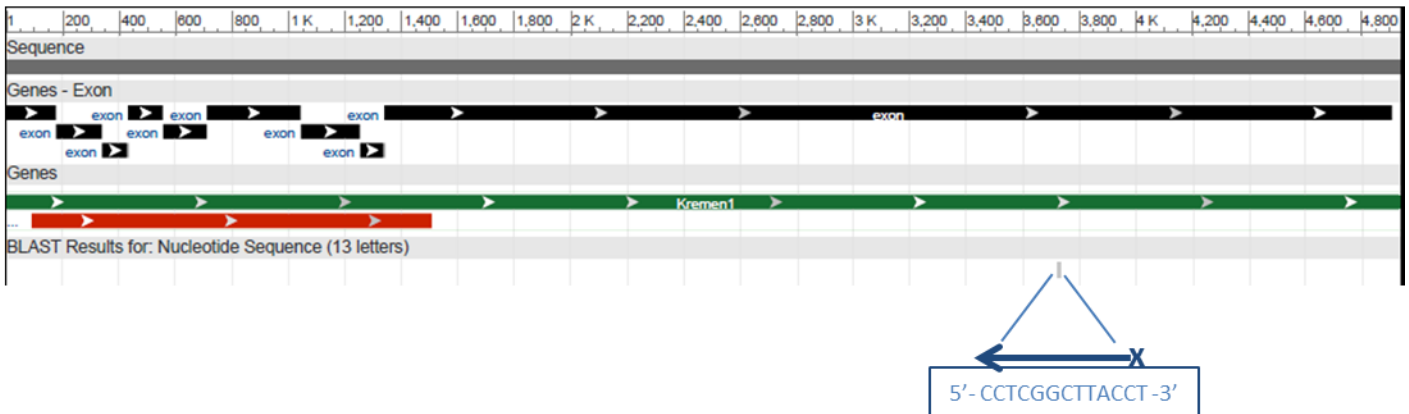

**C** Expression of Kremen1 and Kif13a in kidney

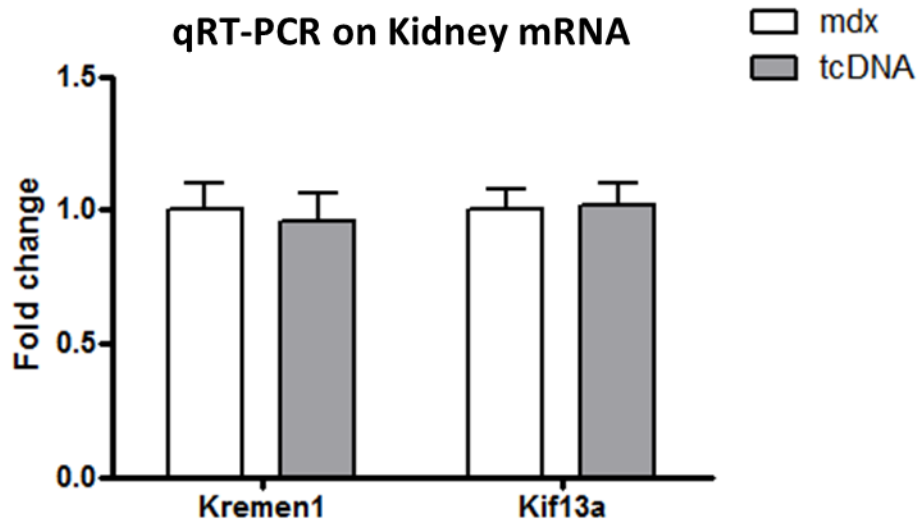

**Fig. S4. Hybridization mediated-Off Target effects (OTEs) on mRNA mouse transcript. (A)** Nucleotide blast analysis identifies 4 mRNA targets, Kremen1, Kif13a, Hopx and Ucn3 t with (12nt/13nt) homology (100% homology 12/12). The tcDNA hybridization can only occur on Kremen1 mRNA as the strand are Plus/Minus. **(B)** Sequence alignment of Kremen1 gene with the tcDNA sequence to visualize the localization of hybridization (last exon). Hybridization of 12nt on 13nt (the last nucleotide (T) of the tcDNA sequence does not match). **(C)** Expression of Kremen1 and Kif13a in the kidney of *mdx* control and tcDNA-treated *mdx*. Kidney was chosen to evaluate OTEs because of the high expression of the 2 target genes and the high amount of tcDNA detected in kidneys following 12 weeks of injections at 200mg/kg/wk as shown in figure 1D. No significant differences are observed following the treatment. Data are mean  $\pm$ SEM (n=3 for *mdx* control and n=4 for tcDNA mouse). Primers were also designed to evaluate the expression of Hopx and Ucn3, but their expression levels were below the detection threshold limit and could therefore not be analysed.

| Gene Name | Forward               | Reverse              |
|-----------|-----------------------|----------------------|
| IFNg      | GCGTCATTGAATCACACCTG  | TGAGCTCATTGAATGCTTGG |
| IL6       | CAAAGCCAGAGTCCTTCAGAG | GCCACTCCTTCTGTGACTCC |
| Gzmb      | TCGACCCTACATGGCCTTAC  | TCCTTCACAGTGAGCAGCAG |
| IP10      | AAGTGCTGCCGTCATTTTCT  | CCTATGGCCCTCATTCTCAC |
| TNF       | CCACCACGCTCTTCTGTCTA  | AGGGTCTGGGCCATAGAACT |
| Ccl2      | CCCAATGAGTAGGCTGGAGA  | TCTGGACCCATTCTTCTTG  |
| Ccl3      | ATGAAGGTCTCCACCACTGC  | GATGAATTGGCGTGGAATCT |
| B2m       | GAGCCCAAGACCGTCTACTG  | GCTATTTCTTCTGCGTGCAT |
| Kim1      | AGCTACAGGAAGACCCACGA  | TGTCACAGTGCCATTCCAGT |
| Ren1      | ATCTTTGACACGGGTTACGC  | TGATCCGTAGTGGATGGTGA |
| EGF       | GAAGTGTGAGCCAGGTCCTC  | CACCAATTGCTGGTGATTTG |
| Kremen1   | GCGAGCACAATTATTGCAGA  | TGGGTTTCCATGATCCTTGT |
| Hopx      | GCCAGCAGGCTATTTAAGCA  | GGGTGCTTGTTGACCTTGTT |
| Ucn3      | AAGCTGCAACCCTGAACAGT  | AGTAGGTGGGCATCAGCATC |
| Kif13a    | TGGGAAGAGAAGCTGAGGAA  | TGACGAGGTAGCACTTGTCG |

**Table S1. RT-qPCR primer sequences**
